# Supplementary material
Source: publisher figshare collection journal article supplement (https://tandf.figshare.com/ndownloader/files/15222203)

Appendix B: The individual transmissibility responses of 21 participants at 24 anatomical locations. Excluded measurements include: one participant at T2P1, T3P1, and H1 and two participants at M4.


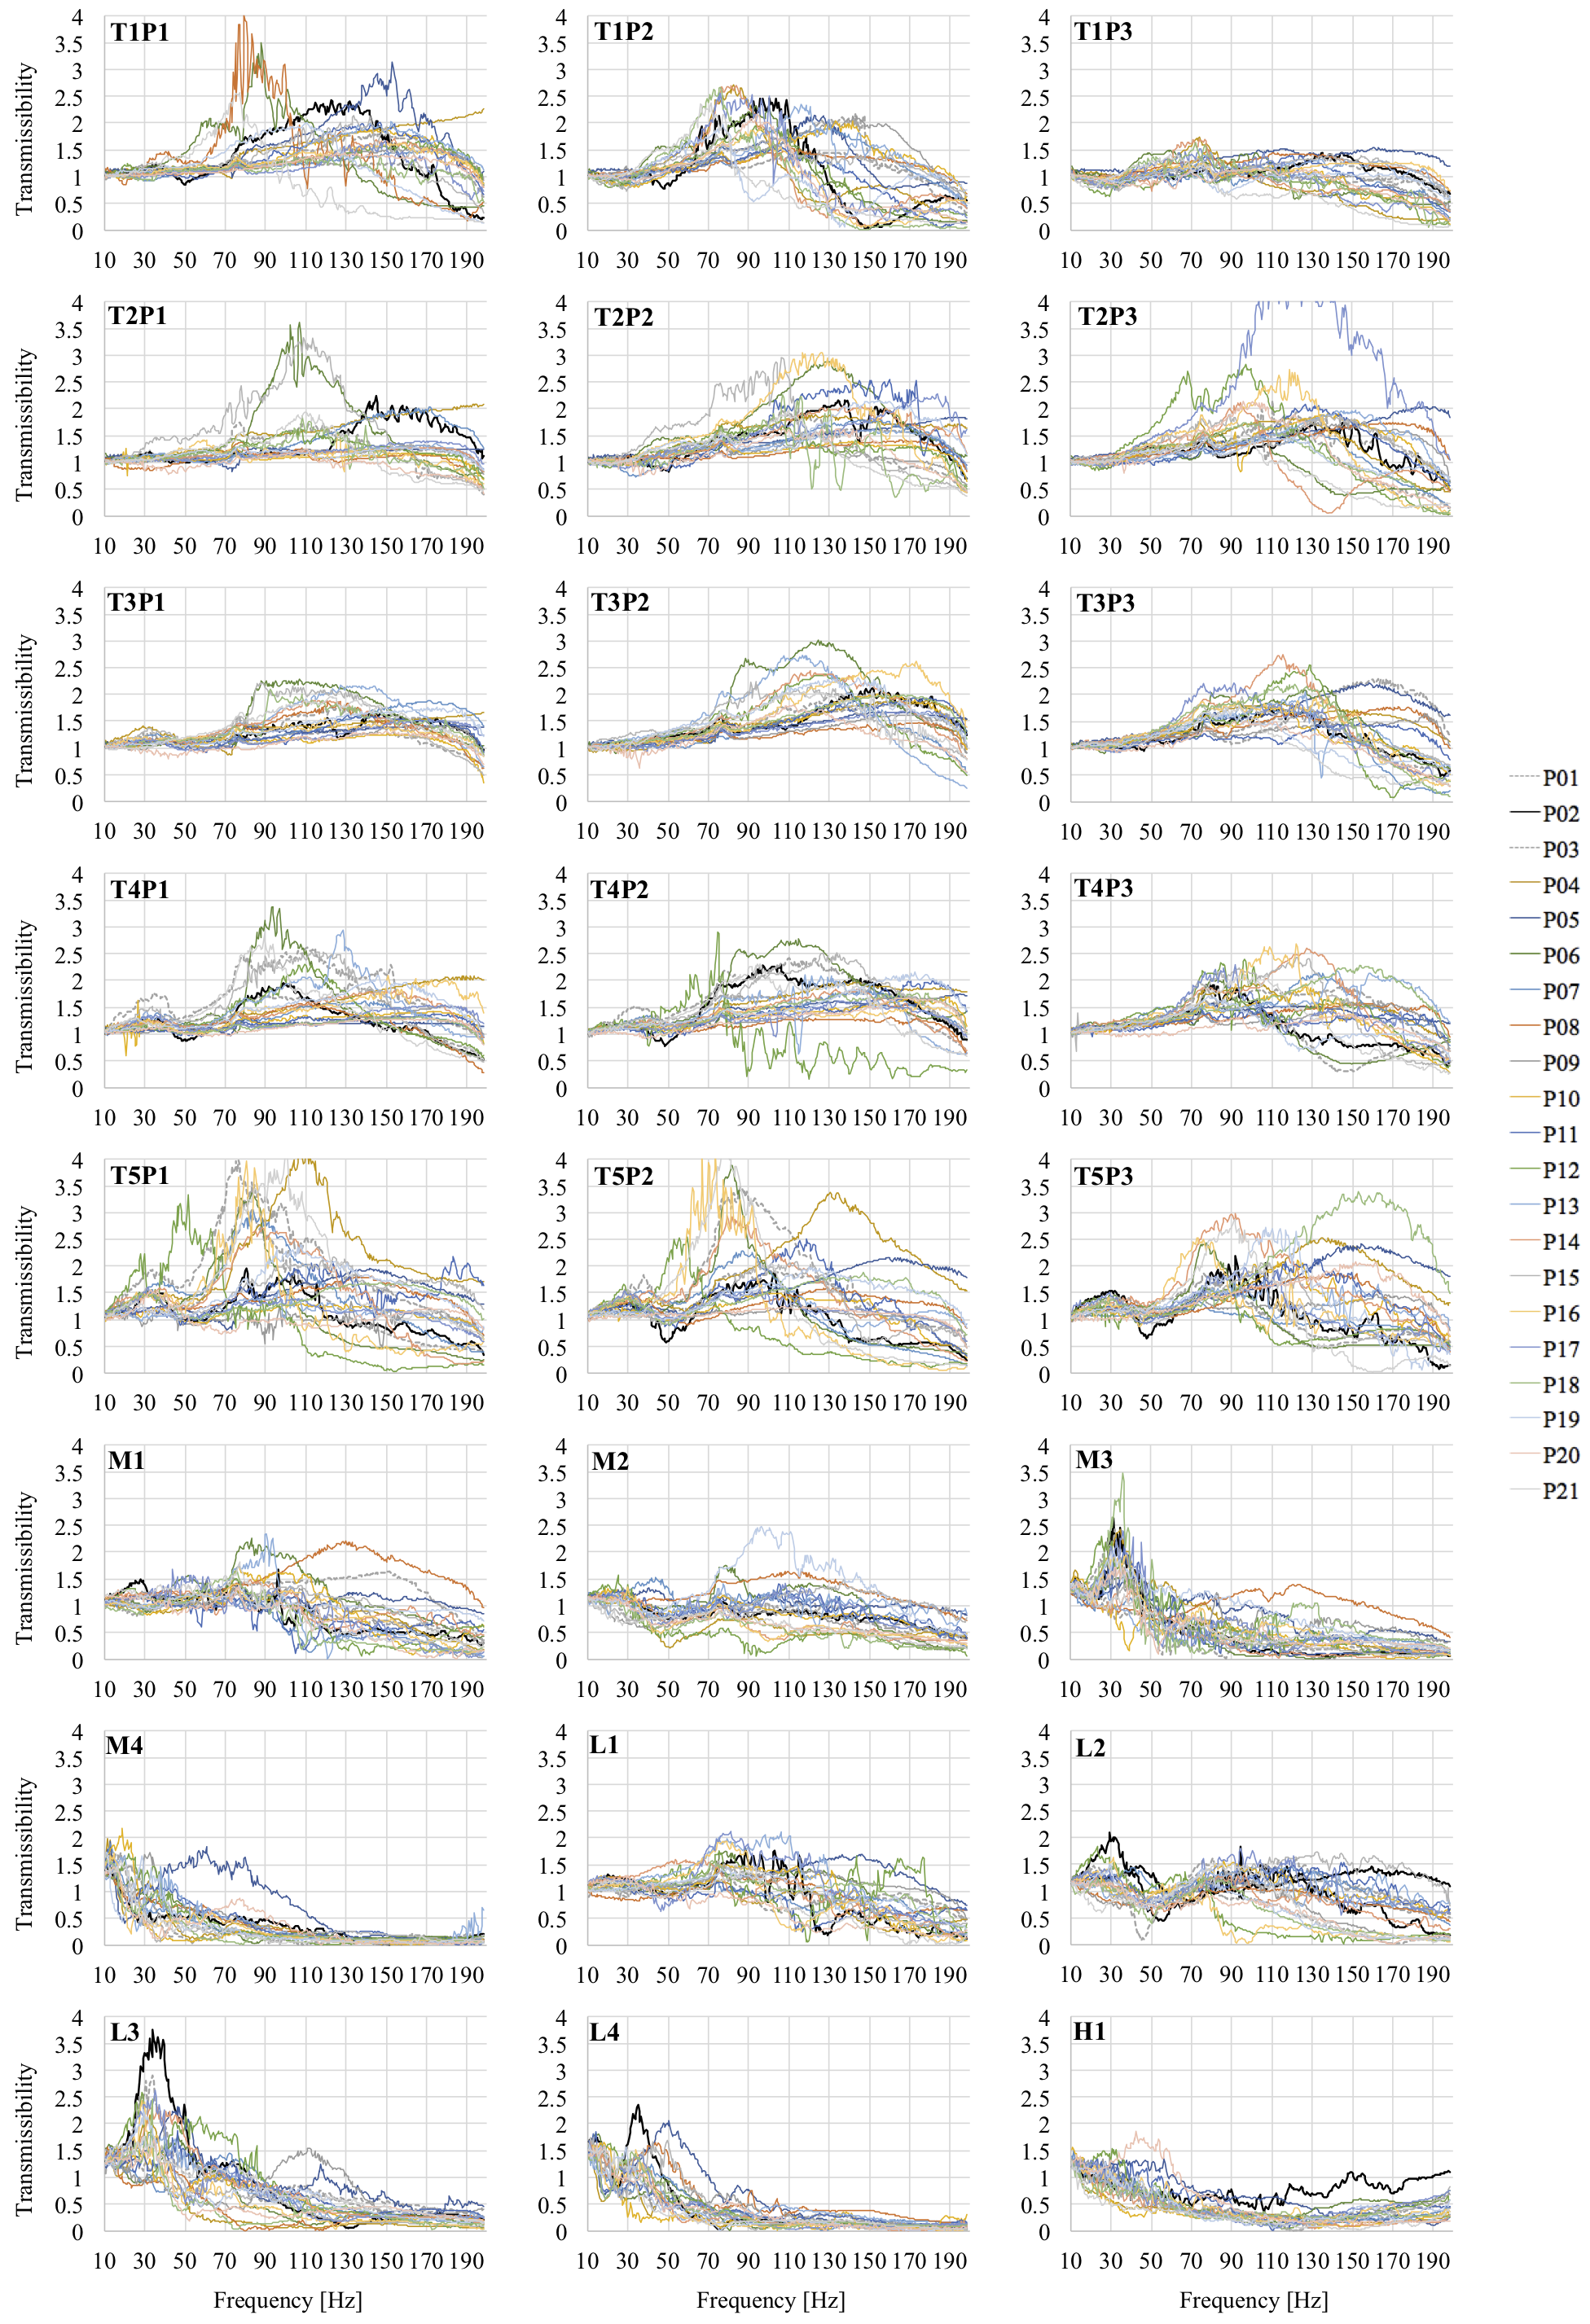

Supplement: Supplementary file 1 [file 15222203]
